# Supplementary material
Source: MDPI journal article supplement (https://www.mdpi.com/2038-8330/15/2/27)

## **Supplemental Materials**

**Title:** Changes in Hematologic Lab Measures Observed in Patients with Paroxysmal Nocturnal Hemoglobinuria Treated with C5 Inhibitors, Ravulizumab and Eculizumab: Real-World Evidence from a US Based EMR Network

**Author:** Jesse Fishman<sup>1\*</sup>, Seth Kuranz<sup>2</sup>, Michael M Yeh<sup>1</sup>, Kaylen Brzozowski<sup>2</sup>, Herman Chen<sup>2</sup>

### **Affiliations:**

<sup>1</sup>Apellis Pharmaceuticals, Inc., Waltham, MA 02451, USA

<sup>2</sup>TriNetX, LLC, Cambridge, MA 02140, USA

## Contents

|                                                                                                                                                             |   |
|-------------------------------------------------------------------------------------------------------------------------------------------------------------|---|
| TriNetX data source.....                                                                                                                                    | 3 |
| Table S1. Distribution of the number of laboratory measures.....                                                                                            | 5 |
| Figure S1. Study design (A) and example of timeframes for patients who switched (B) .....                                                                   | 6 |
| Figure S2. Mean ( $\pm$ SD) absolute reticulocyte count (ARC) from baseline through 12 months<br>following initiation of C5 inhibitor (C5i) treatment. .... | 7 |
| Table S2: List of codes and variable definitions used in the study.....                                                                                     | 8 |

## TriNetX data source

TriNetX, LLC (“TriNetX”) is a global federated electronic medical record (EMR) network.

Network members include academic medical centers, integrated delivery networks, specialty hospitals, and large specialty physician practices. The Dataworks-USA Network is comprised of inpatient and outpatient EMRs from 44 US member HCOs that allow the data to be used for research purposes as long as the contributor is not identified and data are pooled across the contributing HCOs.

TriNetX maps the data to a standard and controlled set of clinical terminologies. The data is then transformed into a proprietary data schema. This transformation process includes an extensive data quality assessment that includes ‘data cleaning’ that rejects records that do not meet the TriNetX quality standards. The data elements in TriNetX include, but are not limited to:

- **Demographic data** include elements such as age, gender, race, ethnicity, marital status, and US Census region.
- **Encounter data** include elements such as start date, end date, and encounter type (ambulatory, emergency room, inpatient, home health, inpatient non-acute, observation, pre-admission, short stay, and virtual).
- **Diagnosis data** are mapped to ICD-10-CM and include diagnosis code, date, and whether the diagnosis was indicated as primary, secondary, or unknown. Diagnoses may also be indicated as admitting diagnoses or reason for visit.
- **Procedure data** are mapped to ICD-10-PCS, CPT, SNOMED, or HCPCS and include code, date, and whether the procedure was indicated as primary, secondary, or unknown.

- **Medication data** are mapped by ingredient to RxNorm and include code, start date, route of administration, brand, strength, quantity dispensed, and days supply.
- **Lab data** are mapped to LOINC or TriNetX custom codes and include code, date recorded, lab result (numeric or positive/negative/unknown), and units of measure.
- **Vital Signs** are mapped to LOINC or TriNetX custom codes and include code, date, value, and units of measure

A detailed description of the TriNetX data source can be found in the Supplementary Material of “Taquet M, Geddes JR, Husain M, Luciano S, Harrison PJ. 6-month neurological and psychiatric outcomes in 236 379 survivors of COVID-19: a retrospective cohort study using electronic health records. *Lancet Psychiatry*. 2021;8(5):416-427. doi:10.1016/S2215-0366(21)00084-5”

More information on TriNetX and the data quality process can be found in “Topaloglu U, Palchuk MB. Using a federated network of real-world data to optimize clinical trials operations. *JCO Clin Cancer Inform*. 2018;2:1-10. doi:10.1200/CCI.17.00067”

**Table S1. Distribution of the number of laboratory measures**

| RAV (Prior ECU)         |                |      |      |        |        |        |
|-------------------------|----------------|------|------|--------|--------|--------|
| Total labs              | n <sup>a</sup> | Mean | SD   | Median | LL IQR | UL IQR |
| Baseline                |                |      |      |        |        |        |
| Hb                      | 39             | 21.1 | 28.9 | 14     | 3      | 25     |
| LDH                     | 32             | 10.6 | 10.7 | 6      | 2      | 18     |
| ARC                     | 19             | 6.1  | 8.7  | 2      | 1      | 6      |
| 1-90 days post-index    |                |      |      |        |        |        |
| Hb                      | 28             | 4.9  | 6.1  | 2.5    | 1      | 7.5    |
| LDH                     | 21             | 2.3  | 1.6  | 2      | 1      | 3      |
| ARC                     | 5              | 2.2  | 1.3  | 2      | 1      | 3      |
| 91-180 days post-index  |                |      |      |        |        |        |
| Hb                      | 27             | 3.4  | 3.8  | 2      | 1      | 4      |
| LDH                     | 20             | 1.9  | 1.5  | 1      | 1      | 2      |
| ARC                     | 7              | 1.6  | 0.8  | 1      | 1      | 2      |
| 181-365 days post-index |                |      |      |        |        |        |
| Hb                      | 25             | 4.8  | 2.5  | 4      | 3      | 5      |
| LDH                     | 19             | 3.2  | 1.4  | 3      | 2      | 4      |
| ARC                     | 7              | 1.7  | 1.3  | 1      | 1      | 3      |

| RAV (ECU Naïve)         |                |      |      |        |        |        |
|-------------------------|----------------|------|------|--------|--------|--------|
| Total labs              | n <sup>a</sup> | Mean | SD   | Median | LL IQR | UL IQR |
| Baseline                |                |      |      |        |        |        |
| Hb                      | 29             | 10.7 | 16.2 | 5      | 1      | 13     |
| LDH                     | 26             | 4.7  | 5.8  | 3      | 1      | 5      |
| ARC                     | 11             | 2.0  | 1.1  | 2      | 1      | 3      |
| 1-90 days post-index    |                |      |      |        |        |        |
| Hb                      | 16             | 4.2  | 4.4  | 2      | 1      | 5.5    |
| LDH                     | 13             | 2.3  | 1.9  | 2      | 1      | 2      |
| ARC                     | 4              | 1.8  | 1.5  | 1      | 1      | 2.5    |
| 91-180 days post-index  |                |      |      |        |        |        |
| Hb                      | 14             | 3.9  | 5.7  | 2      | 1      | 3      |
| LDH                     | 13             | 2.0  | 1.5  | 1      | 1      | 2      |
| ARC                     | 2              | 2.5  | 2.1  | 2.5    | 1      | 4      |
| 181-365 days post-index |                |      |      |        |        |        |
| Hb                      | 10             | 8.8  | 11.0 | 4      | 3      | 11     |
| LDH                     | 8              | 4.9  | 3.4  | 4      | 2.5    | 7      |
| ARC                     | 3              | 2.7  | 2.9  | 1      | 1      | 6      |

| ECU                     |                |      |      |        |        |        |
|-------------------------|----------------|------|------|--------|--------|--------|
| Total labs              | n <sup>a</sup> | Mean | SD   | Median | LL IQR | UL IQR |
| Baseline                |                |      |      |        |        |        |
| Hb                      | 126            | 16.3 | 21.0 | 9      | 3      | 22     |
| LDH                     | 89             | 7.3  | 11.2 | 4      | 2      | 8      |
| ARC                     | 43             | 3.9  | 5.5  | 2      | 1      | 3      |
| 1-90 days post-index    |                |      |      |        |        |        |
| Hb                      | 93             | 11.0 | 14.6 | 6      | 4      | 10     |
| LDH                     | 67             | 5.4  | 3.7  | 5      | 2      | 8      |
| ARC                     | 19             | 3.7  | 3.4  | 4      | 1      | 5      |
| 91-180 days post-index  |                |      |      |        |        |        |
| Hb                      | 66             | 7.0  | 6.6  | 5      | 3      | 8      |
| LDH                     | 48             | 5.4  | 4.7  | 4      | 3      | 6      |
| ARC                     | 11             | 6.4  | 6.2  | 5      | 2      | 8      |
| 181-365 days post-index |                |      |      |        |        |        |
| Hb                      | 65             | 13.5 | 15.2 | 10     | 4      | 15     |
| LDH                     | 49             | 9.1  | 10.8 | 5      | 2      | 13     |
| ARC                     | 16             | 4.1  | 4.3  | 2      | 1.5    | 5      |

Abbreviations: ARC, absolute reticulocyte count; ECU, eculizumab; Hb, hemoglobin; IQR, interquartile range; LDH, lactate dehydrogenase, LL, lower limit; RAV, ravulizumab; SD, standard deviation; UL, upper limit.

<sup>a</sup>Number of unique patients

**Figure S1. Study design (A) and example of timeframes for patients who switched (B)**

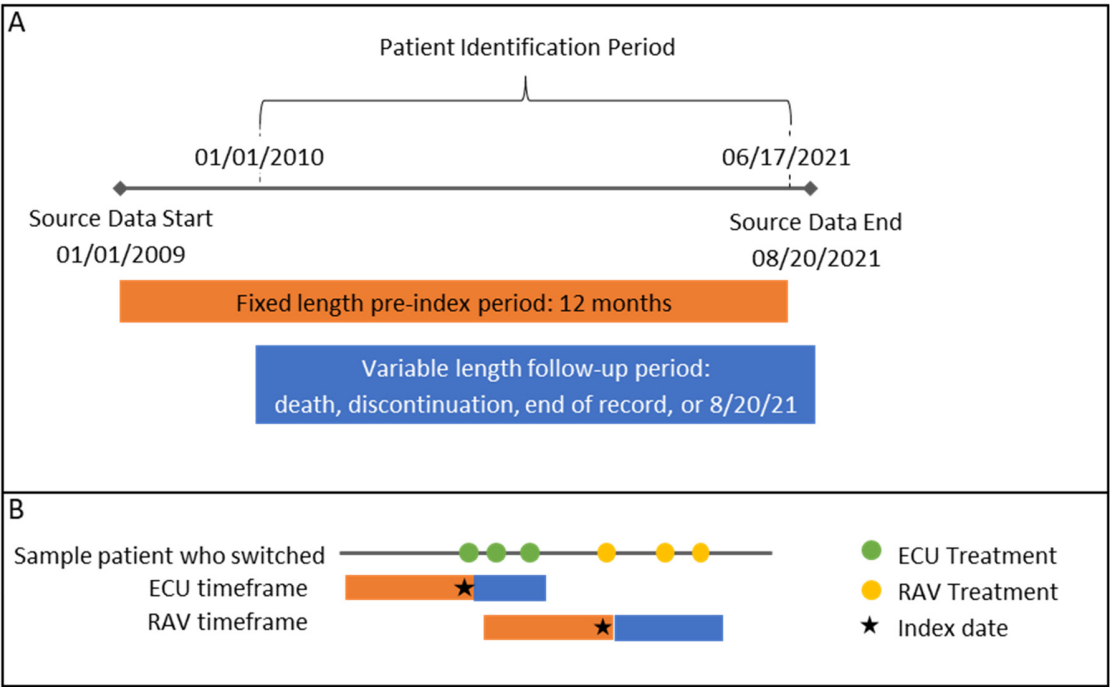

**Figure S2. Mean ( $\pm$ SD) absolute reticulocyte count (ARC) from baseline through 12 months following initiation of C5 inhibitor (C5i) treatment.**

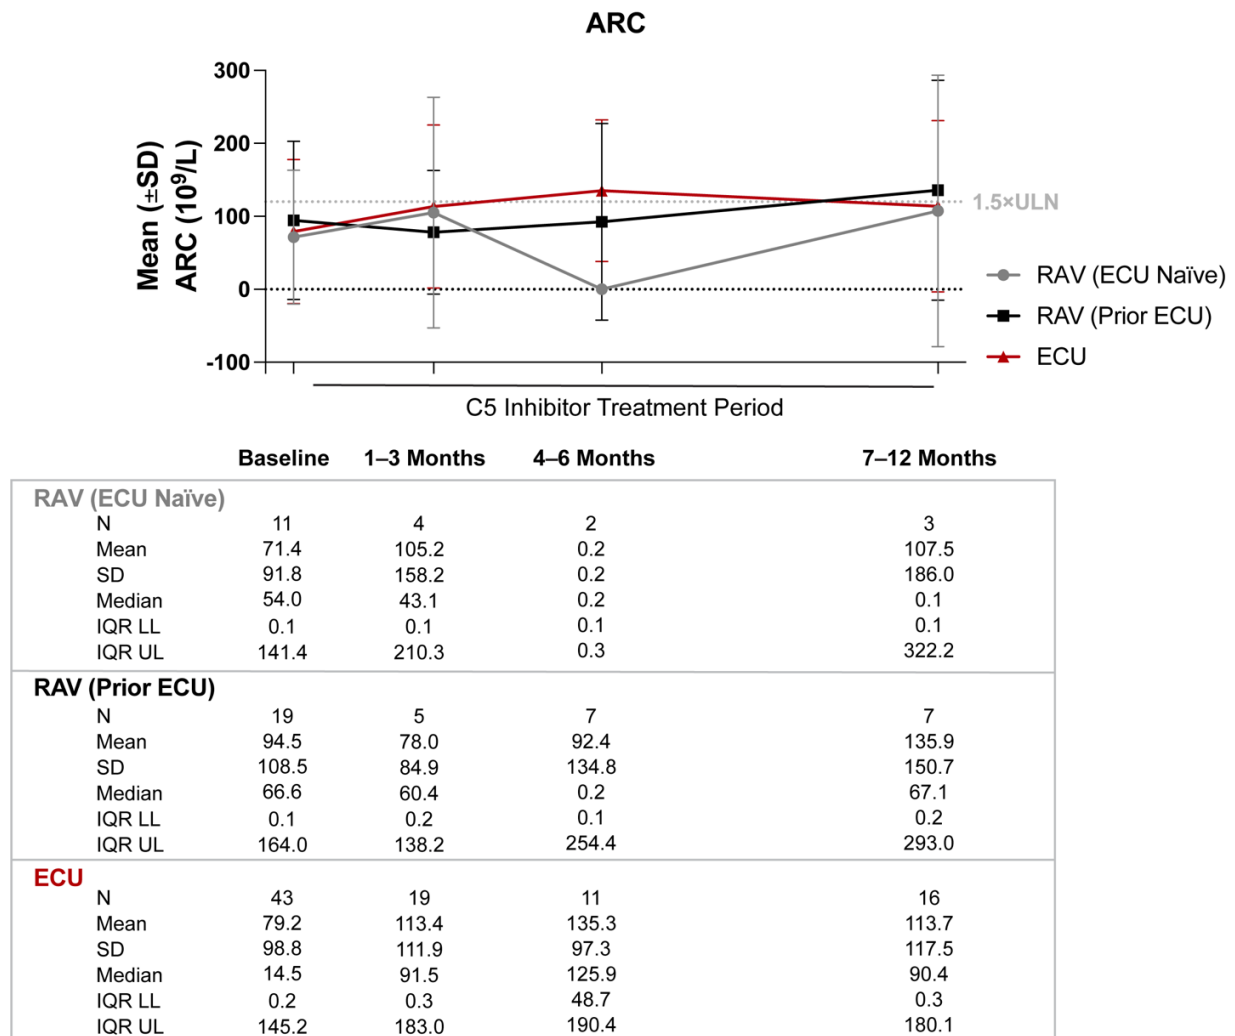

Abbreviations: ECU, eculizumab; IQR LL, interquartile range lower limit; IQR UL, interquartile range upper limit; RAV, ravulizumab; SD, standard deviation; ULN, upper limit of normal.  
 Note: 1.5 times the ULN for ARC was defined as  $120 \times 10^9/L$ .

**Table S2: List of codes and variable definitions used in the study**

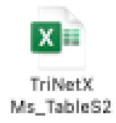

Supplement: s1 [file s1]
